# Supplementary material
Source: publisher figshare collection journal article supplement (https://acs.figshare.com/ndownloader/files/4165348)
Supplement: Supplementary file 1 [file 4165348]

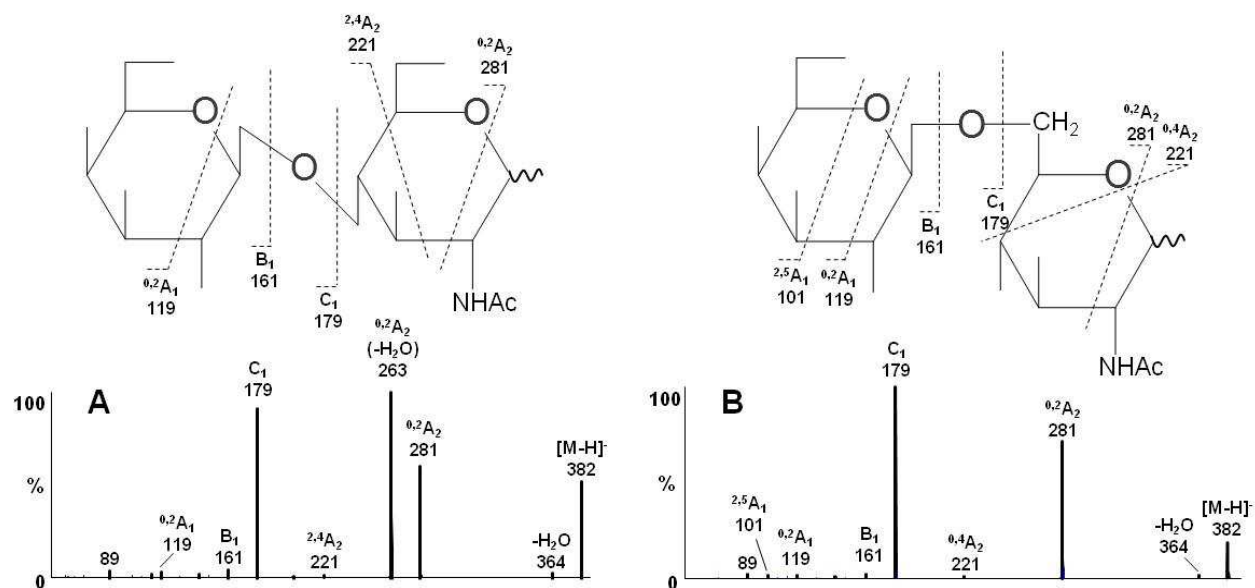

**Supplemental Figure 1.** ESI-MS/MS spectra of [M-H]<sup>-</sup> ions of the Gal-GlcNAc isomers. (A)

Sample compound, Gal-GlcNAc peak 1; (B) Sample compound, Gal-GlcNAc peak 2.

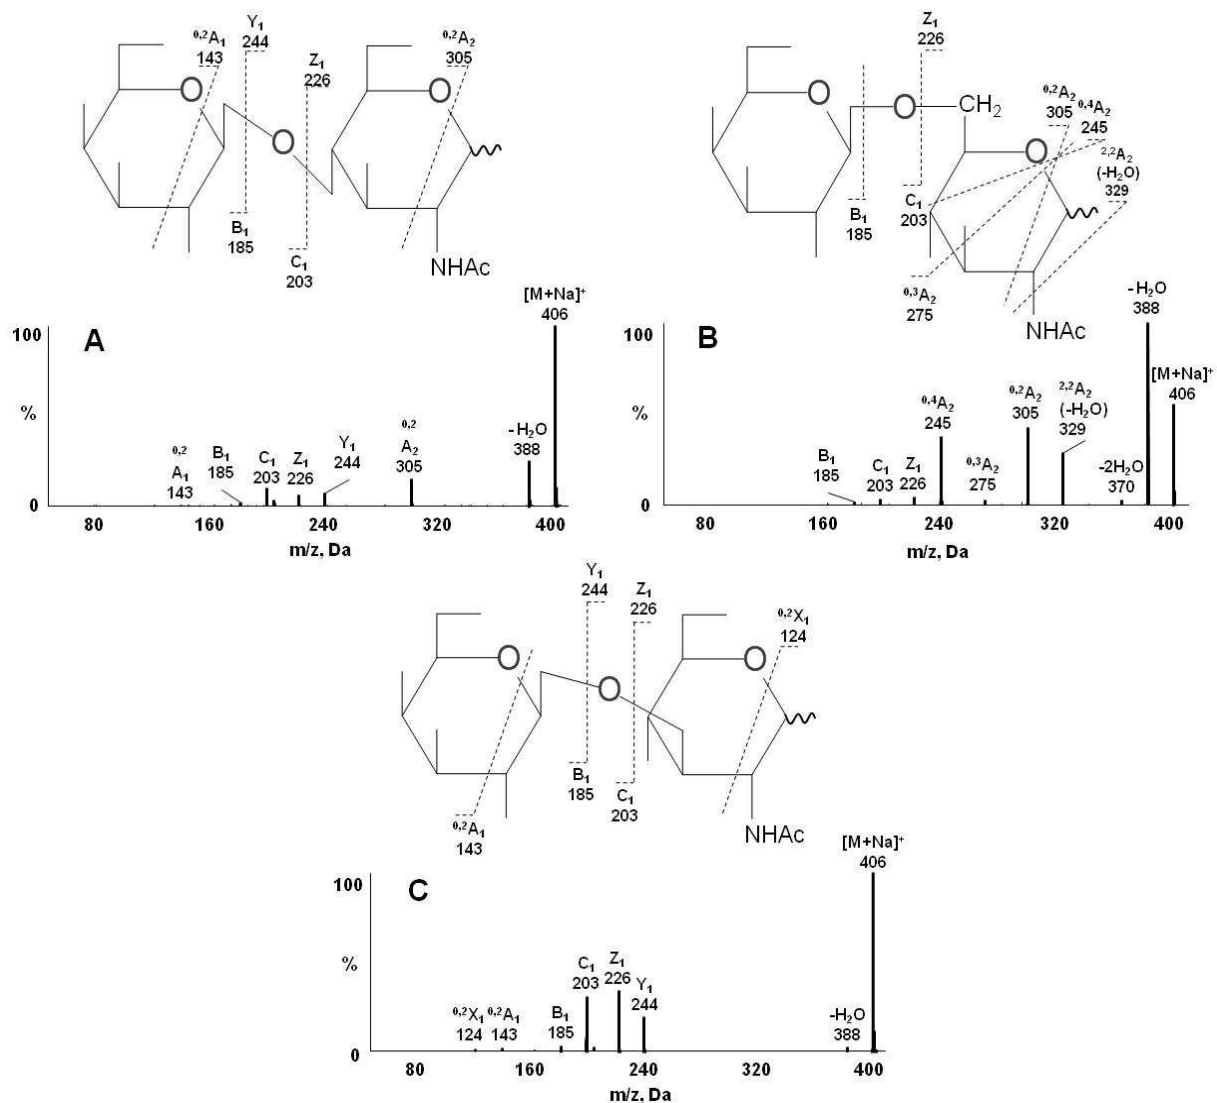

**Supplemental Figure 2.** ESI-MS/MS sodiated spectra of Gal-GlcNAc standards,  $[M+Na]^+$  at  $m/z$  406. (A) Gal $\beta$ -(1 $\rightarrow$ 4)-GlcNAc standard; (B) Gal $\beta$ -(1 $\rightarrow$ 6)-GlcNAc standard; (C) Gal $\beta$ -(1 $\rightarrow$ 3)-GlcNAc standard. Structures are shown to indicate proposed fragmentation.

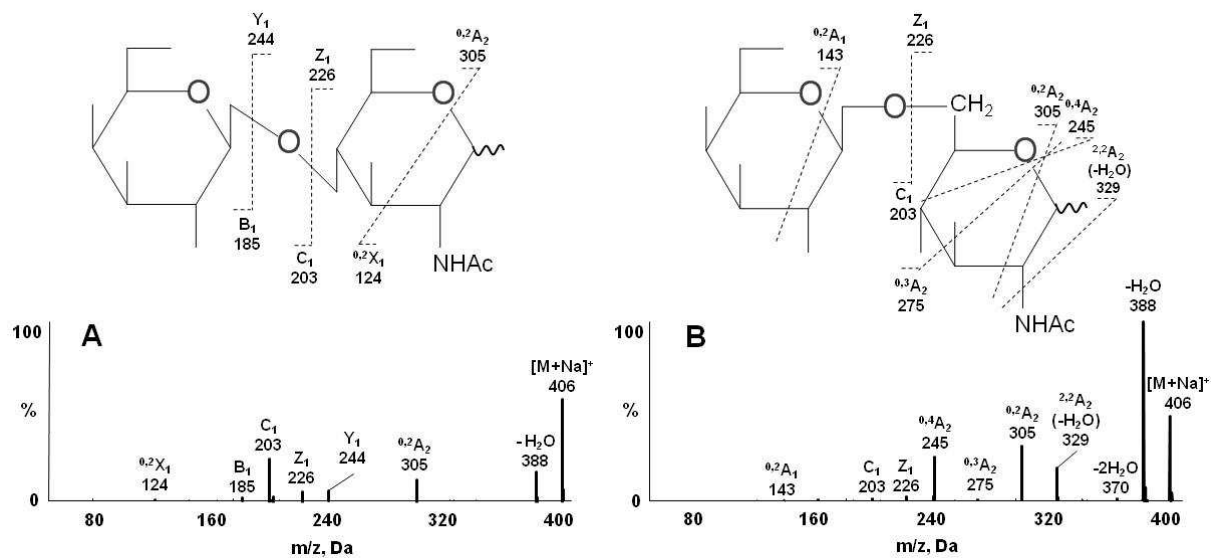

**Supplemental Figure 3.** ESI-MS/MS sodiated spectra of Gal-GlcNAc sample compounds,  $[M+Na]^+$  at  $m/z$  406. (A) Gal-GlcNAc peak 1; (B) Gal-GlcNAc peak 2; Structures are shown to indicate proposed fragmentation.

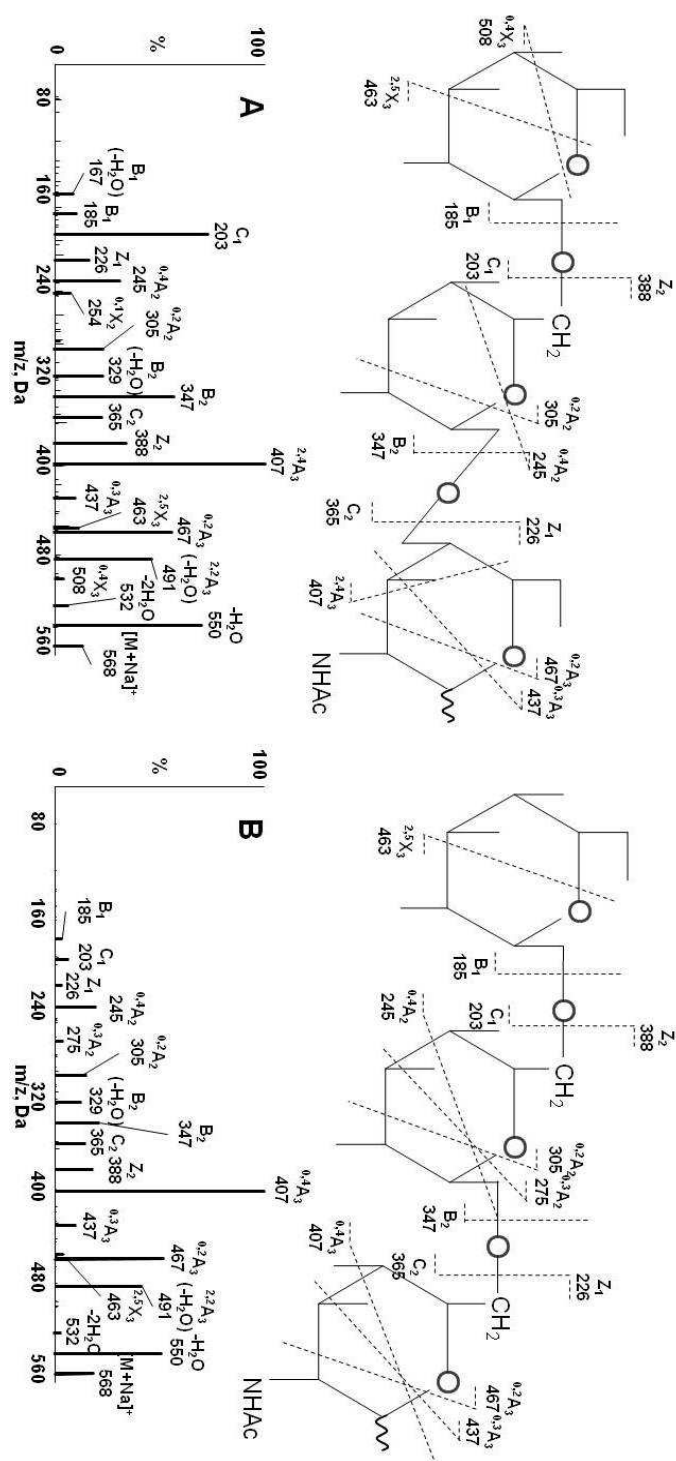

**Supplemental Figure 4.** ESI-MS/MS sodiated spectra of Gal-Gal-GlcNAc sample compounds,  $[M+Na]^+$  at  $m/z$  568. (A) Gal-Gal-GlcNAc peak 1; (B) Gal-Gal-GlcNAc peak 2; Structures are shown to indicate proposed fragmentation.

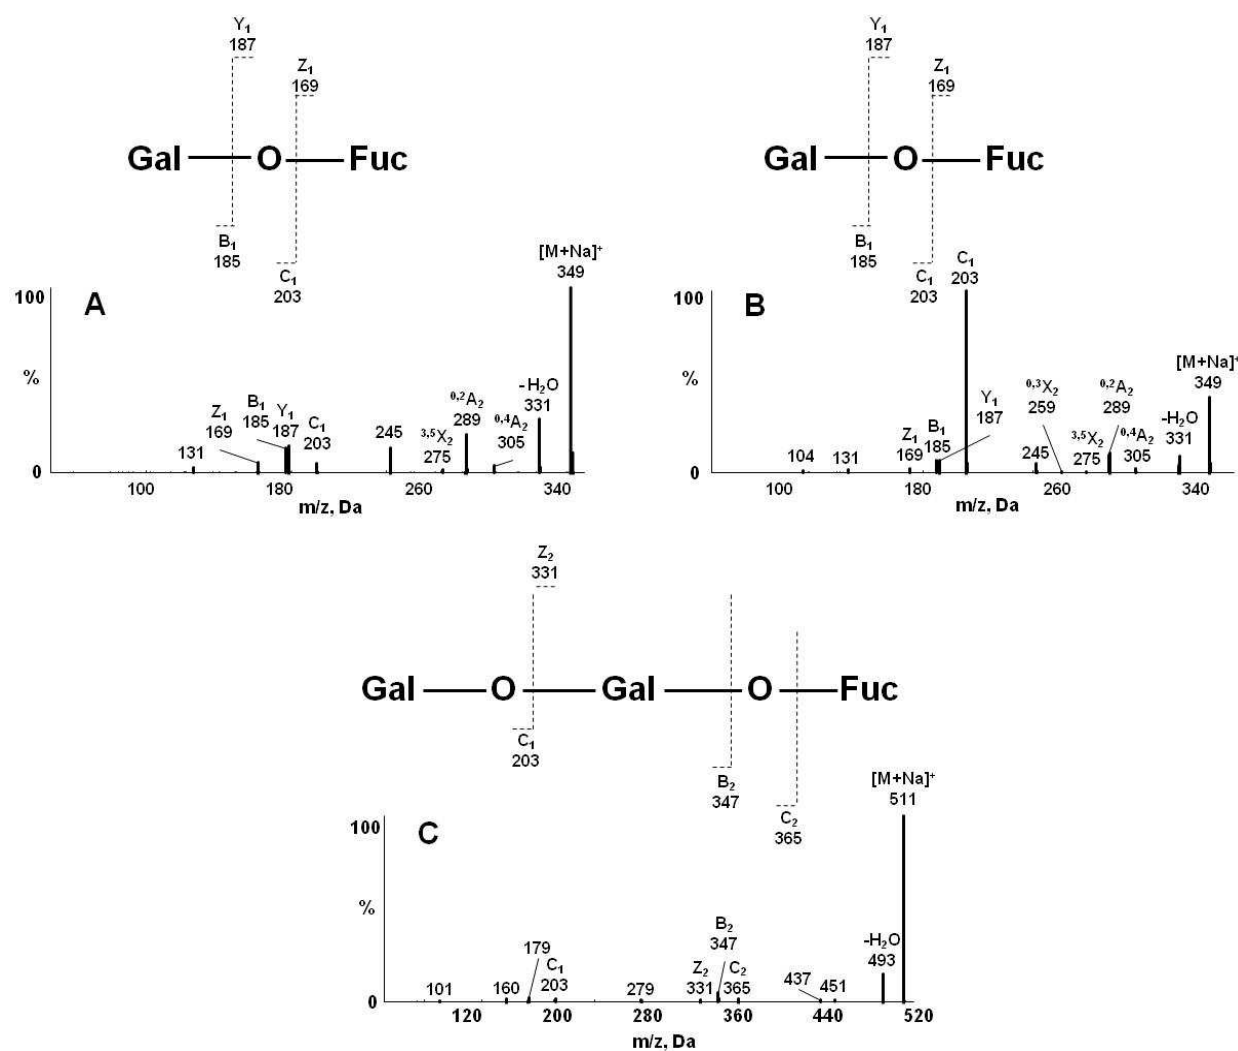

**Supplemental Figure 5.** ESI-MS/MS sodiated spectra of sample compounds. (A) Gal-Fuc peak 1,  $[M+Na]^+$  at  $m/z$  349; (B) Gal-Fuc peak 2,  $[M+Na]^+$  at  $m/z$  349; (C) Representative of sample compound Gal-Gal-Fuc peak 1, 2 and 3,  $[M+Na]^+$  at  $m/z$  511; Structures are shown to indicate proposed fragmentation.

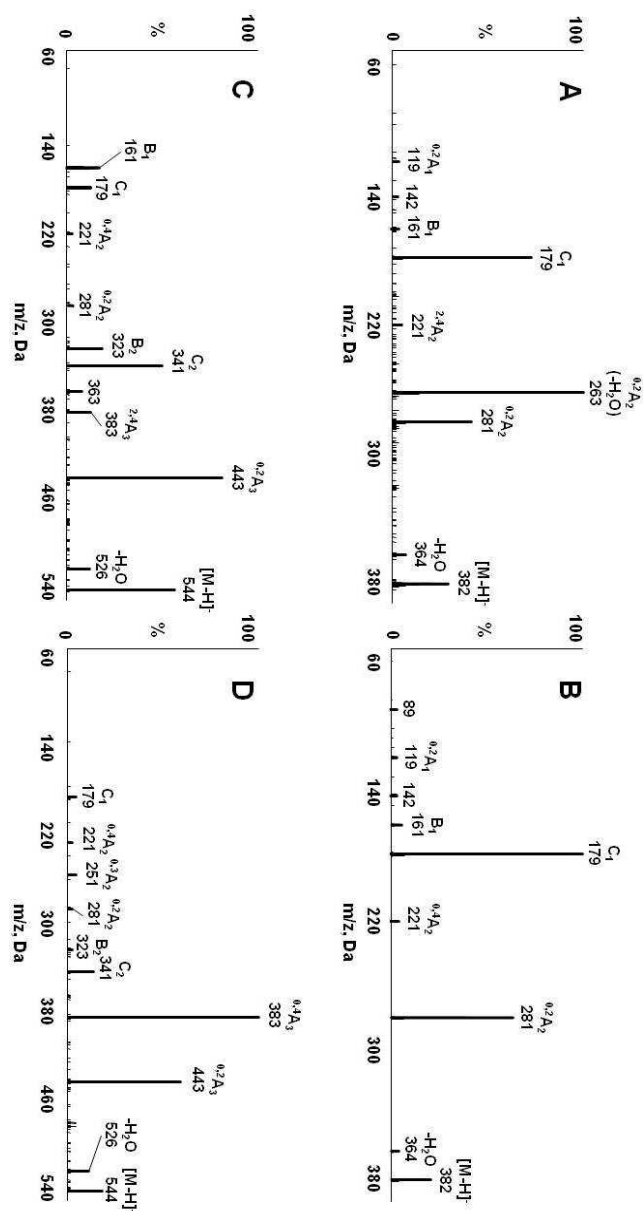

**Supplemental Figure 6.** ESI-MS/MS spectra of  $[M-H]^-$  ions of galactosylated GlcNAc formed by CCE of *Lactococcus lactis* MG1363 expressing LacLM of *L. plantarum* FUA3112. (A) Gal-GlcNAc  $m/z$  382 with a retention time of 18.1 minutes; (B) Gal-GlcNAc  $m/z$  382 with a retention time of 22.9 minutes; (C) Gal-Gal-GlcNAc  $m/z$  544 with a retention time of 54.8 minutes; (D) Gal-Gal-GlcNAc  $m/z$  544 with a retention time of 66.8 minutes.

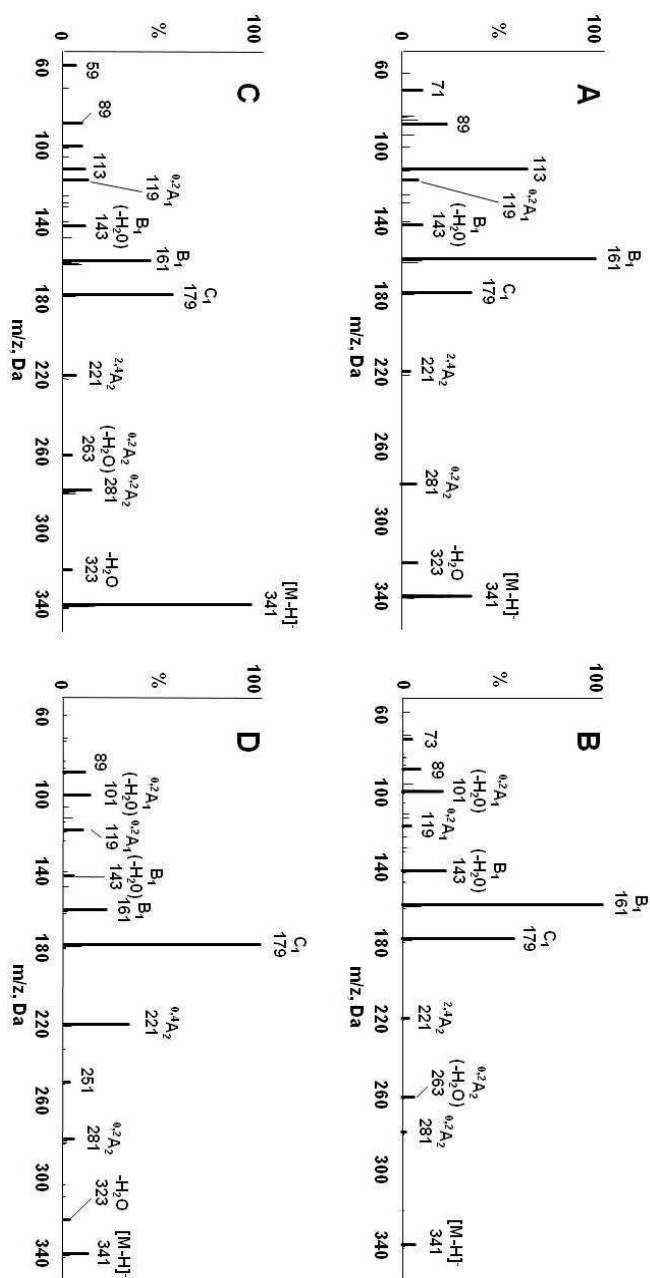

**Supplemental Figure 7.** ESI-MS/MS spectra of  $[M-H]^-$  ions of galacto-oligosaccharides formed by CCE of *Lactococcus lactis* MG1363 expressing LacLM of *L. plantarum* FUA3112. (A) Gal- $\beta$ -(1 $\rightarrow$ 3)Glc/Gal  $m/z$  341 with a retention time of 15.5 minutes; (B) Lactose  $m/z$  341 with a retention time of 17.5 minutes; (C) Gal- $\beta$ -(1 $\rightarrow$ 4)-Gal  $m/z$  341 with a retention time of 20.1 minutes; (D) Gal- $\beta$ -(1 $\rightarrow$ 6)Glc/Gal  $m/z$  341 with a retention time of 22.0 minutes.
